# Supplementary material for: Recognising socio-cultural barriers while seeking early detection services for breast cancer: a study from a Universal Health Coverage setting in India
Source: PubMed Central journal article supplement (PMC10507865; doi:10.1186/s12885-023-11359-3), 2023-09-19
Supplement: 12885_2023_11359_MOESM1_ESM.pdf [file 12885_2023_11359_MOESM1_ESM.pdf]

## Barriers to Breast Health Seeking and Screening Uptake in an Urban Community in Mumbai, India

(✓ Tick wherever appropriate)

Name

CHSS No.  /

DOB

Designation

*(Only year if not remember)*

Address

### A. Socio Demographic Characteristics

|                                                                                                                                                                                                                                                      |                                                                                                                                                                                                                                                                                     |                                                                                                                                                                                                                                                                |                                                                                                                                                                                                          |                                                                                                                                                                                                                            |
|------------------------------------------------------------------------------------------------------------------------------------------------------------------------------------------------------------------------------------------------------|-------------------------------------------------------------------------------------------------------------------------------------------------------------------------------------------------------------------------------------------------------------------------------------|----------------------------------------------------------------------------------------------------------------------------------------------------------------------------------------------------------------------------------------------------------------|----------------------------------------------------------------------------------------------------------------------------------------------------------------------------------------------------------|----------------------------------------------------------------------------------------------------------------------------------------------------------------------------------------------------------------------------|
| <p>1] Education </p> <p><input type="checkbox"/> 1. Illiterate</p> <p><input type="checkbox"/> 2. School</p> <p><input type="checkbox"/> 3. Graduate</p> <p><input type="checkbox"/> 4. Post graduate</p> <p><input type="checkbox"/> 9. Unknown</p> | <p>2] Marital status</p> <p><input type="checkbox"/> 1. Single</p> <p><input type="checkbox"/> 2. Divorced</p> <p><input type="checkbox"/> 3. Widowed</p> <p><input type="checkbox"/> 4. Married</p> <p><input type="checkbox"/> 9. Unknown</p>                                     | <p>3] Religion</p> <p><input type="checkbox"/> 1. Hindu</p> <p><input type="checkbox"/> 2. Muslim</p> <p><input type="checkbox"/> 3. Christian</p> <p><input type="checkbox"/> 4. Other</p> <p><input type="checkbox"/> 9. Unknown</p>                         | <p>4] Occupation</p> <p><input type="checkbox"/> 1. Housewife</p> <p><input type="checkbox"/> 2. Employed</p> <p><input type="checkbox"/> 3. Professional</p> <p><input type="checkbox"/> 9. Unknown</p> | <p>5] Menstrual History</p> <p><input type="checkbox"/> 1. Premenopausal</p> <p><input type="checkbox"/> 2. Post menopausal</p> <p><input type="checkbox"/> 3. Hysterectomy</p> <p><input type="checkbox"/> 9. Unknown</p> |
| <p>6] Family history of Breast and related cancers</p> <p><input type="checkbox"/> 1. Yes</p> <p><input type="checkbox"/> 2. No</p> <p><input type="checkbox"/> 9. Unknown</p>                                                                       | <p>7] Medical history of any chronic illness/cancer</p> <p><input type="checkbox"/> 1. Yes</p> <p style="text-align: center;"><i>Specify, if Yes</i> <input style="width: 50px;" type="text"/></p> <p><input type="checkbox"/> 2. No</p> <p><input type="checkbox"/> 9. Unknown</p> | <p>8] H/o breast feeding</p> <p><input type="checkbox"/> 1. Yes </p> <p style="text-align: center;"><i>No. of month, if Yes</i> <input style="width: 50px;" type="text"/></p> <p><input type="checkbox"/> 2. No</p> <p><input type="checkbox"/> 9. Unknown</p> | <p>9] Family type </p> <p><input type="checkbox"/> 1. Joint</p> <p><input type="checkbox"/> 2. Nuclear</p> <p><input type="checkbox"/> 9. Unknown</p>                                                    | <p>10] Children  Alive</p> <p><input type="checkbox"/> 1</p> <p><input type="checkbox"/> 2</p> <p><input type="checkbox"/> 3</p> <p><input type="checkbox"/> &gt;3</p>                                                     |
| <p> 11] Monthly income <input style="width: 150px;" type="text"/></p>                                                                                                                                                                                |                                                                                                                                                                                                                                                                                     |                                                                                                                                                                                                                                                                |                                                                                                                                                                                                          |                                                                                                                                                                                                                            |

### B. Questionnaire for barriers to breast health seeking

#### B1. Awareness

1] Have you heard about the breast cancer ?  1. Yes  2. No  9. Unknown

2] Whom have you heard about cancer from ?

|                                                      |                                               |                                             |
|------------------------------------------------------|-----------------------------------------------|---------------------------------------------|
| 1. Family member/Relatives <input type="checkbox"/>  | 3 Friends/Neighbours <input type="checkbox"/> | 6. Multiple source <input type="checkbox"/> |
| 2. Healthcare professionals <input type="checkbox"/> | 4. TV/Newspaper <input type="checkbox"/>      | 9. Unknown <input type="checkbox"/>         |
| 5 internet <input type="checkbox"/>                  |                                               |                                             |

3] Which one or many of the following do you think are symptoms of breast cancer?

|  |                                                            |                          |                          |
|--|------------------------------------------------------------|--------------------------|--------------------------|
|  | 1. Yes                                                     | 2. No                    | 9. Unknown               |
|  | 1. Change in size of the breast <input type="checkbox"/>   | <input type="checkbox"/> | <input type="checkbox"/> |
|  | 2. Blood stained nipple discharge <input type="checkbox"/> | <input type="checkbox"/> | <input type="checkbox"/> |
|  | 3. Lump in the breast <input type="checkbox"/>             | <input type="checkbox"/> | <input type="checkbox"/> |
|  | 4. Pain in the breasts <input type="checkbox"/>            | <input type="checkbox"/> | <input type="checkbox"/> |
|  | 5. Skin changes over the breast <input type="checkbox"/>   | <input type="checkbox"/> | <input type="checkbox"/> |
|  | 6. Lump in the arm pit <input type="checkbox"/>            | <input type="checkbox"/> | <input type="checkbox"/> |

## Barriers to Breast Health Seeking and Screening Uptake in an Urban Community in Mumbai, India

(✓ Tick wherever appropriate)

|                                                                                                                                           | 1.Yes                    | 2.No                     | 9.Unknown                |
|-------------------------------------------------------------------------------------------------------------------------------------------|--------------------------|--------------------------|--------------------------|
| 4] Which of the following are Risk factors for developing breast Cancer ?                                                                 |                          |                          |                          |
| a. Family history of breast cancer                                                                                                        | <input type="checkbox"/> | <input type="checkbox"/> | <input type="checkbox"/> |
| b. Alcohol, smoking and other unhealthy life style factors                                                                                | <input type="checkbox"/> | <input type="checkbox"/> | <input type="checkbox"/> |
| c. Overuse of unsupervised contraceptive pills                                                                                            | <input type="checkbox"/> | <input type="checkbox"/> | <input type="checkbox"/> |
| d. Not having children or not breast feeding them                                                                                         | <input type="checkbox"/> | <input type="checkbox"/> | <input type="checkbox"/> |
| e. Infection from other person having cancer                                                                                              | <input type="checkbox"/> | <input type="checkbox"/> | <input type="checkbox"/> |
| 5.1] Are you aware that there is routine breast examination of breast carried out for early detection of cancer at your dispensary / Hosp | <input type="checkbox"/> | <input type="checkbox"/> | <input type="checkbox"/> |
| 5.2] Have you received our Information brochure on Breast awareness ?                                                                     | <input type="checkbox"/> | <input type="checkbox"/> | <input type="checkbox"/> |

### B2 Social and cultural barriers

|                                                                                                              | 1.Yes                    | 2.No                     | 9.Unknown                |
|--------------------------------------------------------------------------------------------------------------|--------------------------|--------------------------|--------------------------|
| 1] Do you feel it's necessary to get breast checkup done even in absence of symptoms?                        | <input type="checkbox"/> | <input type="checkbox"/> | <input type="checkbox"/> |
| 2] Do you feel it is more important to look after health of family members than your own?                    | <input type="checkbox"/> | <input type="checkbox"/> | <input type="checkbox"/> |
| 3] Do you feel your family members or spouse will accompany you or encourage you for routine checkup?        | <input type="checkbox"/> | <input type="checkbox"/> | <input type="checkbox"/> |
| 4] Do you feel you do not have time to go for breast checkup ?                                               | <input type="checkbox"/> | <input type="checkbox"/> | <input type="checkbox"/> |
| 5] Are you afraid that your neighbors or friends may see you as cancer patient if you go for breast checkup? | <input type="checkbox"/> | <input type="checkbox"/> | <input type="checkbox"/> |

### B3 Geographical barriers

|                                                                                        | 1.Yes                    | 2.No                     | 9.Unknown                |
|----------------------------------------------------------------------------------------|--------------------------|--------------------------|--------------------------|
| 1] Wheather dispensary and breast examination service located far from your residence? | <input type="checkbox"/> | <input type="checkbox"/> | <input type="checkbox"/> |

### B4 Perceived Risk

|                                                                                                               | 1.Yes                    | 2.No                     | 9.Unknown                |
|---------------------------------------------------------------------------------------------------------------|--------------------------|--------------------------|--------------------------|
| 1] Do you think that once you show a doctor, they will find some problem and you will need further treatment? | <input type="checkbox"/> | <input type="checkbox"/> | <input type="checkbox"/> |
| 2] Do you feel if detected with cancer you will lose your breast                                              | <input type="checkbox"/> | <input type="checkbox"/> | <input type="checkbox"/> |

### B5. Fatalism and spirituality

|                                                                                                         | 1.Yes                    | 2.No                     | 9.Unknown                |
|---------------------------------------------------------------------------------------------------------|--------------------------|--------------------------|--------------------------|
| 1] Do you think that breast cancer curable ?                                                            | <input type="checkbox"/> | <input type="checkbox"/> | <input type="checkbox"/> |
| 2] Do you think that breast cancer a sin/ punishment for sin from God                                   | <input type="checkbox"/> | <input type="checkbox"/> | <input type="checkbox"/> |
| 3] Do you think alternative medicines/ spiritual healing is better than doctor's medication or surgery? | <input type="checkbox"/> | <input type="checkbox"/> | <input type="checkbox"/> |

### B6. Healthcare related issues

|                                                                                                 | 1.Yes                    | 2.No                     | 9.Unknown                |
|-------------------------------------------------------------------------------------------------|--------------------------|--------------------------|--------------------------|
| 1] Do you think your doctors and hospital can treat you if you are detected with breast cancer? | <input type="checkbox"/> | <input type="checkbox"/> | <input type="checkbox"/> |
| 2] Have you ever felt there was lack of privacy at the checkup center?                          | <input type="checkbox"/> | <input type="checkbox"/> | <input type="checkbox"/> |
| 3] Was the staff rude or indifferent to your desire to get a routine checkup ?                  | <input type="checkbox"/> | <input type="checkbox"/> | <input type="checkbox"/> |
